# Supplementary material
Source: ML conference proceedings conference paper supplement (https://proceedings.mlr.press/v215/miranda23c.html)
Supplement: Supplementary file [file miranda23c-supp.pdf]

## Supplementary material: proofs

These proofs are, due to page constraints, not included in the paper. We provide them here so as to allow the interested reader to check the results.

### Proof of Lemma 2

We will abbreviate  $F := \bigcup_{B \in \mathcal{B}} \mathbb{I}_B(D \downarrow B)$ , and show that  $\mathcal{L}(\Omega)_{>0} \subseteq \text{posi}(F)$ . This will imply the desired result that  $\text{posi}(\check{D} \cup F \cup \mathcal{L}(\Omega)_{>0}) = \text{posi}(\check{D} \cup F)$ : indeed, since  $\text{posi}$  is a closure operator, we infer that  $\text{posi}(\check{D} \cup F \cup \mathcal{L}(\Omega)_{>0}) \subseteq \text{posi}(\check{D} \cup \text{posi}(F) \cup \mathcal{L}(\Omega)_{>0}) = \text{posi}(\check{D} \cup \text{posi}(F)) \subseteq \text{posi}(\text{posi}(\check{D} \cup F)) = \text{posi}(\check{D} \cup F) \subseteq \text{posi}(\check{D} \cup F \cup \mathcal{L}(\Omega)_{>0})$ , where the first equality follows once we establish that  $\mathcal{L}(\Omega)_{>0} \subseteq \text{posi}(F)$ . So consider any  $f$  in  $\mathcal{L}(\Omega)_{>0}$ . For any  $B$  in  $\mathcal{B}$ , let  $f_B : B \rightarrow \mathbb{R} : x \mapsto f(x)$  be  $f$ 's restriction to  $B$ , so that  $f = \sum_{B \in \mathcal{B}} \mathbb{I}_B f_B$ . Collect in  $\mathcal{E} := \{B \in \mathcal{B} : f_B \in \mathcal{L}(B)_{>0}\} = \{B \in \mathcal{B} : f(x) > 0 \text{ for some } x \text{ in } B\} \subseteq \mathcal{B}$  the events in  $\mathcal{B}$  on which  $f$  attains a positive value. That  $f$  belongs to  $\mathcal{L}(\Omega)_{>0}$  implies that  $\mathcal{E}$  is non-empty. For every  $B$  in  $\mathcal{B} \setminus \mathcal{E}$  it follows that  $f_B = 0$ , and hence  $f = \sum_{B \in \mathcal{E}} \mathbb{I}_B f_B$ . Note that, for every  $B$  in  $\mathcal{E}$ , the gamble  $f_B > 0$  belongs to  $D \downarrow B$  by its coherence whence  $\mathbb{I}_B f \in \mathbb{I}_B D \downarrow B$ , and therefore, indeed,  $f = \sum_{B \in \mathcal{B}} \mathbb{I}_B f_B \in \text{posi}(\bigcup_{B \in \mathcal{B}} \mathbb{I}_B(D \downarrow B)) = \text{posi}(F)$ .

**Lemma 16** For any  $F^* \subseteq \mathcal{L}$  such that  $\text{posi}(F^*) \cap \mathcal{L}_{<0} = \emptyset$ , we have

$$K_{\text{posi}(F^*)} = \text{Rs}(\text{Posi}(K_{F^*})).$$

**Proof** We will show that (i)  $K_{\text{posi}(F^*)} \subseteq \text{Rs}(\text{Posi}(K_{F^*}))$  and (ii)  $K_{\text{posi}(F^*)} \supseteq \text{Rs}(\text{Posi}(K_{F^*}))$ .

For (i), consider any  $F$  in  $K_{\text{posi}(F^*)}$ , implying that there are  $n$  in  $\mathbb{N}$ , real coefficients  $\lambda_{1:n} > 0$  and  $g_1, \dots, g_n$  in  $F^*$  such that  $g := \sum_{k=1}^n \lambda_k g_k \in F$ . Note that the requirement  $\text{posi}(F^*) \cap \mathcal{L}_{<0} = \emptyset$  implies that  $g \notin \mathcal{L}_{<0}$ . By letting  $F_1 := \{g_1\} \in K_{F^*}$ ,  $\dots$ ,  $F_n := \{g_n\} \in K_{F^*}$ , and  $\lambda_{1:n}^{g_1} := \lambda_{1:n} > 0$ , we find that  $\{\sum_{k=1}^n \lambda_k^{f_{1:n}} f_k : f_{1:n} \in \times_{k=1}^n F_k\} = \{\sum_{k=1}^n \lambda_k g_k\} = \{g\}$  belongs to  $\text{Posi}(K_{F^*})$ , whence, indeed,  $F \in \text{Rs}(\text{Posi}(K_{F^*}))$  since  $g \notin \mathcal{L}_{<0}$ .

Conversely, for (ii), consider any  $F$  in  $\text{Rs}(\text{Posi}(K_{F^*}))$ , so  $F \supseteq F' \setminus \mathcal{L}_{>0}$  for some  $F'$  in  $\text{Posi}(K_{F^*})$ . This implies that  $F' = \{\sum_{k=1}^n \lambda_k^{f_{1:n}} f_k : f_{1:n} \in \times_{k=1}^n F_k\}$  for some  $n$  in  $\mathbb{N}$ ,  $F_1, \dots, F_n$  in  $K_{F^*}$  and real coefficients  $\lambda_{1:n}^{f_{1:n}} > 0$  for every  $f_{1:n}$  in  $\times_{k=1}^n F_k$ . That all of  $F_1, \dots, F_n$  belong to  $K_{F^*}$  means that  $F_1 \cap F^* \neq \emptyset, \dots, F_n \cap F^* \neq \emptyset$ , so there are  $g_1 \in F_1 \cap F^*, \dots, g_n \in F_n \cap F^*$ . Then the specific  $g := \sum_{k=1}^n \lambda_k^{g_{1:n}} g_k \in F'$  belongs to  $\text{posi}(F^*)$ , which tells us that  $g \notin \mathcal{L}_{<0}$ , and hence  $g$  belongs to  $F$ , whence  $F \cap \text{posi}(F^*) \neq \emptyset$ . Therefore indeed  $F \in K_{\text{posi}(F^*)}$ . ■

**Lemma 17** For any  $\mathcal{F} \subseteq \mathcal{P}(\mathcal{L})$  we have

$$K_{\bigcup \mathcal{F}} = \bigcup_{F \in \mathcal{F}} K_F.$$

**Proof** Consider any  $F^*$  in  $\mathcal{Q}$ , and infer that, indeed,

$$F^* \in K_{\bigcup \mathcal{F}} \Leftrightarrow F^* \cap \bigcup \mathcal{F} \neq \emptyset \Leftrightarrow (\exists F \in \mathcal{F}) F^* \cap F \neq \emptyset \Leftrightarrow (\exists F \in \mathcal{F}) F^* \in K_F \Leftrightarrow F^* \in \bigcup_{F \in \mathcal{F}} K_F,$$

which establishes the desired equality. ■

### Proof of Theorem 5

We start with the first statement. We will first show that  $\mathcal{L}^s(\Omega)_{>0} \subseteq \text{Posi}(\bigcup_{B \in \mathcal{B}} \mathbb{I}_B(K \downarrow B))$ , which will establish the second equality: indeed, abbreviating  $\mathcal{F} := \bigcup_{B \in \mathcal{B}} \mathbb{I}_B(K \downarrow B)$ , since  $K$  and  $\text{Posi}$  are closure operators, we infer that  $\text{Rs}(\text{Posi}(\check{K} \cup \mathcal{F} \cup \mathcal{L}_{>0}^s)) \subseteq \text{Rs}(\text{Posi}(\check{K} \cup \text{Posi}(\mathcal{F}) \cup \mathcal{L}_{>0}^s)) = \text{Rs}(\text{Posi}(\check{K} \cup \text{Posi}(\mathcal{F}))) \subseteq \text{Rs}(\text{Posi}(\text{Posi}(\check{K} \cup \mathcal{F}))) = \text{Rs}(\text{Posi}(\check{K} \cup \mathcal{F})) \subseteq \text{Rs}(\text{Posi}(\check{K} \cup \mathcal{F} \cup \mathcal{L}_{>0}^s))$ , where the first equality follows once we establish that  $\mathcal{L}_{>0}^s \subseteq \text{Posi}(\mathcal{F})$ . So consider any  $\{f\}$  in  $\mathcal{L}^s(\Omega)_{>0}$ —which implies that  $f \in \mathcal{L}(\Omega)_{>0}$ —and any  $D$  in  $\mathbf{D}(K)$ . Then using the same argument as in the proof of Lemma 2 we infer that  $f \in \text{posi}(\bigcup_{B \in \mathcal{B}} \mathbb{I}_B(D \downarrow B))$ , or, in other words, that  $\{f\} \in K_{\text{posi}(\bigcup_{B \in \mathcal{B}} \mathbb{I}_B(D \downarrow B))}$ . Now use Lemma 16 to infer that then  $\{f\} \in \text{Rs}(\text{Posi}(K_{\bigcup_{B \in \mathcal{B}} \mathbb{I}_B(D \downarrow B)})))$  and hence  $\{f\} \in \text{Posi}(K_{\bigcup_{B \in \mathcal{B}} \mathbb{I}_B(D \downarrow B)})$  since

$f \in \mathcal{L}_{>0}$  and therefore  $f \notin \mathcal{L}_{<0}$ , and use subsequently Lemma 17 to infer that then  $\{f\} \in \text{Posi}(\bigcup_{B \in \mathcal{B}} K_{\mathbb{1}_B D} \mathbb{1}_B) = \text{Posi}(\bigcup_{B \in \mathcal{B}} \mathbb{1}_B K_D \mathbb{1}_B) = \text{Posi}(\bigcup_{B \in \mathcal{B}} \mathbb{1}_B K_D \mathbb{1}_B)$ .

Next we show that  $\widehat{K}$  satisfies “agreeing on  $\mathcal{B}$ ” and “rigidity”. To this end, note that  $\widehat{K}$  satisfies “agreeing on  $\mathcal{B}$ ” by its definition and the fact that Rs and Posi are closure operators. Moreover, for any  $B$  in  $\mathcal{B}$ , we have that  $\widehat{K} \mathbb{1}_B = \{F \in \mathcal{Q}(B) : \mathbb{1}_B F \in \widehat{K}\} \supseteq \{F \in \mathcal{Q}(B) : \mathbb{1}_B F \in \mathbb{1}_B(K \mathbb{1}_B)\} = K \mathbb{1}_B$  again using that Rs and Posi are closure operators, so  $\widehat{K}$  satisfies “rigidity” also.

We now turn to showing that  $\widehat{K}$  is coherent. To this end, we infer from [6, Thm. 10] that if  $\check{K} \cup \bigcup_{B \in \mathcal{B}} \mathbb{1}_B(K \mathbb{1}_B)$  is consistent, then  $\widehat{K}$  is the expression for its natural extension, which then is guaranteed to be coherent. We verify that  $\check{K} \cup \bigcup_{B \in \mathcal{B}} \mathbb{1}_B(K \mathbb{1}_B)$  is consistent by considering any  $\widehat{D}$  in the non-empty  $\widehat{\mathbf{D}} \subseteq \overline{\mathbf{D}}$ ,<sup>8</sup> and showing that  $\check{K} \cup \bigcup_{B \in \mathcal{B}} \mathbb{1}_B(K \mathbb{1}_B)$  is a subset of  $K_{\widehat{D}}$ , which is a coherent set of desirable gamble sets by [6, Lem. 12]. This will prove in one fell swoop that  $\widehat{K} \subseteq \bigcap_{\widehat{D} \in \widehat{\mathbf{D}}} K_{\widehat{D}}$ , a useful property that we will use later on in this proof when establishing the second statement.

In order to do so, note that  $\widehat{D} = \text{posi}(\check{D} \cup \bigcup_{B \in \mathcal{B}} \mathbb{1}_B(D \mathbb{1}_B))$  for some  $\check{D}$  in  $\mathbf{D}(\check{K})$  and  $D$  in  $\mathbf{D}(K)$ . Consider any  $F$  in  $\widehat{K}$ , meaning that  $F \supseteq F' \setminus \mathcal{L}_{<0}$  for some  $n$  in  $\mathbb{N}$ ,  $F_1, \dots, F_n$  in  $\check{K} \cup \bigcup_{B \in \mathcal{B}} \mathbb{1}_B(K \mathbb{1}_B)$ , and, for every  $f_{1:n}$  in  $\times_{k=1}^n F_k$ , real coefficients  $\lambda_{1:n}^{f_{1:n}} > 0$  such that  $F' = \{\sum_{k=1}^n \lambda_k^{f_{1:n}} f_k : f_{1:n} \in \times_{k=1}^n F_k\}$ . So any  $F_k$  belongs to  $\check{K}$ —in which case it also belongs to  $K_{\check{D}}$  as  $\check{D} \in \mathbf{D}(\check{K})$ , and hence  $F_k$  contains a gamble  $g_k \in \check{D}$ —or  $F_k$  belongs to  $\mathbb{1}_B(K \mathbb{1}_B)$  for some  $B$  in  $\mathcal{B}$ —in which case it also belongs to  $\mathbb{1}_B(K_D \mathbb{1}_B) = \mathbb{1}_B(K_D \mathbb{1}_B)$  as  $D \in \mathbf{D}(K)$ , and hence  $F$  contains a gamble  $\mathbb{1}_B g_k$  where  $g_k \in D \mathbb{1}_B$ . In any case, we find that  $\sum_{k=1}^n \lambda_k^{f_{1:n}} g_k \in F'$  belongs to  $\text{posi}(\check{D} \cup \bigcup_{B \in \mathcal{B}} \mathbb{1}_B(D \mathbb{1}_B)) = \widehat{D}$ , and hence  $F' \in K_{\widehat{D}}$ . This implies that, indeed,  $F \in K_{\widehat{D}}$ .

So we have established that  $\widehat{K}$  satisfies “agreeing on  $\mathcal{B}$ ”, “rigidity” and “coherence”. To complete the proof for the first statement, we show that  $\widehat{K}$  is the smallest such set of desirable gamble sets. To this end, consider any set of desirable gamble sets  $K^*$  satisfying “agreeing on  $\mathcal{B}$ ”, “rigidity” and “coherence”. Note that  $K^*$  must include  $\check{K}$  by “agreeing on  $\mathcal{B}$ ” and  $\bigcup_{B \in \mathcal{B}} \mathbb{1}_B K \mathbb{1}_B$  by “rigidity”. By “coherence” it must therefore include  $\text{Rs}(\text{Posi}(\check{D} \cup \bigcup_{B \in \mathcal{B}} \mathbb{1}_B(D \mathbb{1}_B))) = \widehat{K}$ , whence  $K^* \supseteq \widehat{K}$ , showing that, indeed,  $\widehat{K}$  is the smallest set of desirable gambles that satisfies “agreeing on  $\mathcal{B}$ ”, “rigidity” and “coherence”. This also establishes that the smallest set of desirable gamble sets that satisfies “agreeing on  $\mathcal{B}$ ”, “rigidity” and “coherence” is necessarily unique.

Now we turn to the second statement. We need to show that  $\widehat{K} = \bigcap_{\widehat{D} \in \widehat{\mathbf{D}}} K_{\widehat{D}}$ . Recall from the proof of the first statement that  $\widehat{K} \subseteq \bigcap_{\widehat{D} \in \widehat{\mathbf{D}}} K_{\widehat{D}}$ , so it suffices to prove the converse set inclusion  $\bigcap_{\widehat{D} \in \widehat{\mathbf{D}}} K_{\widehat{D}} \subseteq \widehat{K}$ . To this end, we use a theorem privately communicated to us by Jasper De Bock and Gert de Cooman that follows from their [7, Thm. 9], in the form of [38, Thm. 6]: ‘The natural extension of a consistent assessment  $\mathcal{F}$  is given by  $\bigcap \{K_D : D \in \overline{\mathbf{D}}, \mathcal{F} \subseteq K_D\}$ ’. Applied to the current case, as the assessment  $\check{K} \cup \bigcup_{B \in \mathcal{B}} \mathbb{1}_B(K \mathbb{1}_B)$  is already known to be consistent from the proof for the first statement, we infer that

$$\widehat{K} = \bigcap \left\{ K_D : D \in \overline{\mathbf{D}}, \check{K} \cup \bigcup_{B \in \mathcal{B}} \mathbb{1}_B(K \mathbb{1}_B) \subseteq K_D \right\},$$

and hence to establish that  $\bigcap_{\widehat{D} \in \widehat{\mathbf{D}}} K_{\widehat{D}} \subseteq \widehat{K}$  it suffices to show that any  $D^*$  in  $\overline{\mathbf{D}}$  such that  $\check{K} \cup \bigcup_{B \in \mathcal{B}} \mathbb{1}_B(K \mathbb{1}_B) \subseteq K_{D^*}$  belongs to  $\widehat{\mathbf{D}}$ . So consider such a  $D^*$ , which implies that  $\widehat{K} \subseteq K_{D^*}$ —meaning that  $D^* \in \mathbf{D}(\widehat{K})$ —and  $\bigcup_{B \in \mathcal{B}} \mathbb{1}_B(K \mathbb{1}_B) \subseteq K_{D^*}$ —meaning that  $\mathbb{1}_B(K \mathbb{1}_B) \subseteq K_{D^*}$  and hence  $K \mathbb{1}_B \subseteq K_{D^*} \mathbb{1}_B = K_{D^* \mathbb{1}_B}$  whence  $D^* \mathbb{1}_B \in \mathbf{D}(K \mathbb{1}_B)$  for all  $B$  in  $\mathcal{B}$ . As  $\bigcup_{B \in \mathcal{B}} \mathbb{1}_B(D^* \mathbb{1}_B) = \bigcup_{B \in \mathcal{B}} \{\mathbb{1}_B f : f \in D^* \mathbb{1}_B\} = \bigcup_{B \in \mathcal{B}} \{\mathbb{1}_B f : \mathbb{1}_B f \in D^*\} \subseteq D^*$ , we find, taking into account its coherence, that  $D^* = \text{posi}(D^* \cup \bigcup_{B \in \mathcal{B}} \mathbb{1}_B(D^* \mathbb{1}_B))$ , whence indeed  $D^* \in \widehat{\mathbf{D}}$ .

### Proof of Proposition 6

We will show (i) that  $\mathcal{M}(\widehat{E}) \subseteq \{P : (\forall A \in \mathcal{P}(\mathcal{B})) P(\mathbb{1}_A) \geq \underline{P}(A) \text{ and } (\forall A' \subseteq \Omega, B \in \mathcal{B}) P(A' | B) \geq \underline{P}(A' | B)\}$  and (ii) that  $\mathcal{M}(\widehat{E}) \supseteq \{P : (\forall A \in \mathcal{P}(\mathcal{B})) P(\mathbb{1}_A) \geq \underline{P}(A) \text{ and } (\forall A' \subseteq \Omega, B \in \mathcal{B}) P(A' | B) \geq \underline{P}(A' | B)\}$ . For (i), consider any  $P$  in  $\mathcal{M}(\widehat{E})$ , which implies that  $P \geq \widehat{E}$ . Since  $\widehat{E} \geq \check{P}$  as  $\widehat{E}$  extends  $\check{E}$  [and  $\check{E}$  is  $\check{P}$ ’s natural extension] and  $\check{P}(B) > 0$  for every  $B$  in  $\mathcal{B}$ , we find that also  $P(B) > 0$  for all  $B \in \mathcal{B}$ , whence  $P = P(P(\cdot | \mathcal{B}))$ , so  $P(\cdot | B)$  is determined uniquely by Bayes’ rule. This implies that  $P(f) \geq \check{E}(f)$  for every  $f \in \mathcal{L}(\mathcal{B})$ , and in particular that  $P(\mathbb{1}_A) \geq \underline{P}(A)$  for every  $A \in \mathcal{P}(\mathcal{B})$ . Moreover, this also implies that  $P(f | B) \geq \check{E}(f | B)$  for every  $B \in \mathcal{B}$  and every  $f \in \mathcal{L}$ , whence  $P(A' | B) \geq \underline{P}(A' | B)$  for all  $A' \subseteq \Omega$  and  $B \in \mathcal{B}$ .

<sup>8</sup>It is a consequence of Thm. 1, which is a direct consequence of [10, Thm. 3], that every element of  $\widehat{\mathbf{D}}$  is a coherent set of desirable gambles.

To show (ii), the inverse inclusion, consider any  $P$  such that  $P(\mathbb{1}_A) \geq \underline{P}(A)$  for all  $A \in \mathcal{P}(\mathcal{B})$  and  $P(A'|B) \geq \underline{P}(A'|B)$  for all  $A' \subseteq \Omega$  and  $B \in \mathcal{B}$ . It follows by the natural extension that  $P(f|B) \geq \underline{E}(f|B)$  for every  $f$  in  $\mathcal{L}(B)$  and  $B$  in  $\mathcal{B}$ , and similarly, that  $P(g) \geq \underline{E}(g)$  for every  $g$  in  $\mathcal{L}(\mathcal{B})$ . consequence,

$$P(f) = P(P(f|\mathcal{B})) \geq \underline{E}(\underline{E}(f|\mathcal{B})) = \widehat{E}(f)$$

for every  $f \in \mathcal{L}(\Omega)$ , which completes the proof.

### Proof of Proposition 7

Assume first of all that  $\widehat{P} \geq \widehat{E} = \underline{E}(\underline{E}(\cdot|\mathcal{B}))$ . Then for any gamble  $f \in \mathcal{L}(\mathcal{B})$  we infer  $\widehat{P}(f) \geq \widehat{E}(f) = \underline{E}(f)$ , whence (a) holds. With respect to (b), for any  $B \in \mathcal{B}$  such that  $\widehat{P}(B) > 0$ , the conditional  $\widehat{P}(\cdot|B)$  coincides with the model  $\widehat{P}$  induces applying regular extension; since  $\mathcal{M}(\widehat{P}) \supseteq \mathcal{M}(\widehat{E})$ , this in turn dominates the conditional induced by  $\widehat{E}$  from regular extension, which must then dominate  $\underline{E}(\cdot|B)$ , that satisfies GBR with respect to  $\widehat{E}$ , using [23, Lem. 2]. Thus (c) holds.

Conversely, if (a) and (b) holds but there is some gamble such that  $\widehat{P}(f) < \widehat{E}(f)$ , then it cannot be  $f \in \mathcal{L}(\mathcal{B})$  by (a); consider then the conditional lower prevision  $\widehat{P}(\cdot|B)$  where  $\widehat{P}(\cdot|B)$  is defined by regular extension if  $\widehat{P}(B) > 0$  and  $\widehat{P}(\cdot|B) = \underline{P}(\cdot|B)$  if  $\widehat{P}(B) = 0$ . Then  $\widehat{P}$  is coherent with  $\widehat{P}(\cdot|B)$ , whence  $\widehat{P}(f) \geq \widehat{P}(\widehat{P}(f|\mathcal{B}))$ . As a consequence, there must be some  $B \in \mathcal{B}$  such that  $\widehat{P}(f|B) < \underline{P}(f|B)$ . But then can neither be  $\widehat{P}(B) > 0$  (by (b)) nor  $\widehat{P}(B) = 0$  (by definition), which leads to a contradiction.

### Proof of Proposition 8

1. Consider two gambles  $f_1, f_2$  on  $\Omega$ . Then  $\widehat{E}(f_1 \wedge f_2) = \underline{E}(\underline{E}(f_1 \wedge f_2|\mathcal{B})) = \underline{E}(g_1 \wedge g_2) = \min\{\underline{E}(g_1), \underline{E}(g_2)\}$ , where  $g_1 = \underline{E}(f_1|\mathcal{B})$ ,  $g_2 = \underline{E}(f_2|\mathcal{B})$ . Thus,  $\widehat{E}$  is minitive.
2. Assume first of all that  $\underline{E}$  is minitive on gambles. Given two events  $A_1, A_2$ , infer that  $\widehat{E}(A_1 \cap A_2) = \underline{E}(\underline{E}(A_1 \cap A_2|\mathcal{B})) = \underline{E}(g_1 \wedge g_2) = \min\{\underline{E}(g_1), \underline{E}(g_2)\} = \min\{\widehat{E}(A_1), \widehat{E}(A_2)\}$ , where  $g_1 = \underline{E}(A_1|\mathcal{B})$ ,  $g_2 = \underline{E}(A_2|\mathcal{B})$ .

Next, if  $\underline{E}(\cdot|B)$  is minitive on gambles, it is  $\{0, 1\}$ -valued on events by [12, Prop. 7]. As a consequence, there exists a filter  $\mathcal{F}_B$  such that

$$\underline{P}(A_1 \cap A_2|B) = \begin{cases} 1 & \text{if } A_1 \cap A_2 \in \mathcal{F}_B \\ 0 & \text{otherwise.} \end{cases}$$

This implies that  $\widehat{E}(A_1 \cap A_2) = \underline{E}(H)$  for  $H := \bigcup\{B: A_1 \cap A_2 \in \mathcal{F}_B\}$ . But since  $H = H_1 \cap H_2$  for  $H_1 := \bigcup\{B: A_1 \in \mathcal{F}_B\}$  and  $H_2 := \bigcup\{B: A_2 \in \mathcal{F}_B\}$  since filters are closed under finite intersections, we deduce that  $\widehat{E}(A_1) = \underline{E}(H_1)$  and  $\widehat{E}(A_2) = \underline{E}(H_2)$ , and therefore  $\widehat{E}(A_1 \cap A_2) = \min\{\widehat{E}(A_1), \widehat{E}(A_2)\}$ .

3. To see this, we need to find some  $B \in \mathcal{B}$  such that  $\underline{P}(B) \in (0, 1)$ , which always exists because  $\underline{E}$  is not minitive on gambles. Similarly, there is some  $A_1 \subset B$  such that  $\underline{P}(A_1|B) \in (0, 1)$ . By defining the events  $H_1 := A_1 \cup B^c$  and  $H_2 := B$ , we infer that:

$$\begin{aligned} \widehat{E}(H_1 \cap H_2) &= \widehat{E}(A_1) = \underline{P}(B) \cdot \underline{P}(A_1|B) \\ \widehat{E}(H_2) &= \underline{P}(B) \\ \widehat{E}(H_1) &= \underline{P}(A_1|B) + (1 - \underline{P}(A_1|B)) \cdot \underline{P}(B^c), \end{aligned}$$

whence  $\widehat{E}(H_1 \cap H_2) < \min\{\widehat{E}(H_1), \widehat{E}(H_2)\}$ .

### Proof of Proposition 11

That the first statement implies the second is trivial. To see the converse, let us establish first of all the implication

$$(\forall \omega \in B) \underline{P}(\mathbb{1}_B(\mathbb{1}_{\{\omega\}} - \underline{E}(\{\omega\}|B))) = 0 \Rightarrow (\forall f \in \mathcal{L}) \underline{P}(\mathbb{1}_B(f - \underline{E}(f|B))) = 0 \quad (6)$$

To this end, consider first of all any event  $A \subseteq B$ , and we will show that  $\underline{P}(B(\mathbb{1}_A - \underline{E}(A|B))) = 0$ . If  $A = B$  then we have  $\underline{P}(B(\mathbb{1}_B - \underline{E}(B|B))) = \underline{P}(\mathbb{1}_B - \mathbb{1}_B \underline{E}(B|B)) = \underline{P}(\mathbb{1}_B - \mathbb{1}_B) = 0$ , so we assume that  $A \subset B$ . Then indeed

$$\underline{P}(B(\mathbb{1}_A - \underline{E}(A|B))) = \underline{P}\left(\sum_{\omega \in A} B(\mathbb{1}_{\{\omega\}} - \underline{E}(\{\omega\}|B))\right) = \sum_{\omega \in A} \underline{P}(B(\mathbb{1}_{\{\omega\}} - \underline{E}(\{\omega\}|B))) = 0,$$

where the first equality follows from applying Eq. (3) twice, taking into account that  $\underline{E}(A|B)$  is a constant, and that coherent lower previsions satisfy constant additivity. The second equality follows once we realise that  $\min \mathbb{1}_B(\mathbb{1}_A - \underline{E}(A|B)) = -\underline{E}(A|B) = -\sum_{\omega \in A} \underline{E}(\{\omega\}|B) = \sum_{\omega \in A} \min \mathbb{1}_B(\mathbb{1}_{\{\omega\}} - \underline{E}(\{\omega\}|B))$ , using that  $A \subset B$ , and the third one by the assumption in Eq. (6).

Next, consider a gamble  $f$  on  $\Omega$  such that  $f = Bf$ , and let us express it as  $f = \sum_{i=1}^n x_i \mathbb{1}_{A_i}$ , for  $x_1 > x_2 > \dots > x_n$  and a partition  $\{A_1, \dots, A_n\}$  of  $B$ . Since a coherent lower prevision always satisfies constant additivity, we can assume without loss of generality that  $x_n = 0$ . Then

$$\begin{aligned} \underline{P}\left(\sum_{i=1}^n x_i \mathbb{1}_{A_i} - \underline{E}(f|B)\right) &= \underline{P}\left(\sum_{i=1}^n x_i \mathbb{1}_{A_i} - \sum_{i=1}^n x_i \underline{E}(A_i|B)\right) \\ &= \underline{P}\left(\sum_{i=1}^n x_i (\mathbb{1}_B(\mathbb{1}_{A_i} - \underline{E}(A_i|B)))\right) = \sum_{i=1}^n x_i \underline{P}(\mathbb{1}_B(\mathbb{1}_{A_i} - \underline{E}(A_i|B))) = 0. \end{aligned}$$

Here the first equality follows from

$$\underline{E}(f|B) = (1 - \delta_B) P_B\left(\sum_{i=1}^n x_i \mathbb{1}_{A_i}\right) + \delta_B \min\left(\sum_{i=1}^n x_i \mathbb{1}_{A_i}\right) = (1 - \delta_B) P_B\left(\sum_{i=1}^n x_i \mathbb{1}_{A_i}\right) = \sum_{i=1}^n x_i \underline{E}(A_i|B),$$

the third from

$$\begin{aligned} \underline{P}\left(\sum_{i=1}^n x_i \mathbb{1}_B(\mathbb{1}_{A_i} - \underline{E}(A_i|B))\right) &= (1 - \delta) P\left(\sum_{i=1}^n x_i \mathbb{1}_B(\mathbb{1}_{A_i} - \underline{E}(A_i|B))\right) + \delta \min\left(\sum_{i=1}^n x_i \mathbb{1}_B(\mathbb{1}_{A_i} - \underline{E}(A_i|B))\right) \\ &= (1 - \delta) \sum_{i=1}^n x_i P(\mathbb{1}_B(\mathbb{1}_{A_i} - \underline{E}(A_i|B))) - \delta \sum_{i=1}^n x_i \underline{E}(A_i|B) \\ &= \sum_{i=1}^n x_i ((1 - \delta) P(\mathbb{1}_B(\mathbb{1}_{A_i} - \underline{E}(A_i|B))) + \delta \min \mathbb{1}_B(\mathbb{1}_{A_i} - \underline{E}(A_i|B))) \\ &= \sum_{i=1}^n x_i \underline{P}(\mathbb{1}_B(\mathbb{1}_{A_i} - \underline{E}(A_i|B))), \end{aligned}$$

and the fourth one by the assumption in Eq. (6). This establishes Eq. (6). Since  $\underline{P}$  is coherent with  $\check{\underline{E}}, \underline{E}(\cdot|B)$  if and only if  $\underline{P}(f) = \check{\underline{E}}(f)$  and  $\underline{P}(\mathbb{1}_B(f - \underline{E}(f|B))) = 0$  for every  $f \in \mathcal{L}$  and every  $B \in \mathcal{B}$ , we deduce (a) from (b).

Let us now prove the equivalence between the second and third statements. To this end, note already that two LV models determined by  $(P_1, \delta_1)$  and  $(P_2, \delta_2)$  are equal if and only if  $P_1 = P_2$  and  $\delta_1 = \delta_2$ . Therefore, we see that  $\underline{P} = \check{\underline{E}}$  is equivalent to  $(B \in \mathcal{B}) P(B) = P_{\mathcal{B}}(B)$  and  $\delta = 1 - \sum_{B \in \mathcal{B}} \check{\underline{E}}(B) = 1 - \sum_{B \in \mathcal{B}} \underline{P}_{\mathcal{B}}(B) = \delta_{\mathcal{B}}$ :

Next, given  $B \in \mathcal{B}$  and  $\omega \in B$ ,

$$\begin{aligned} \underline{P}(B(\mathbb{1}_{\{\omega\}} - \underline{E}(\{\omega\}|B))) &= (1 - \delta) P(B(\mathbb{1}_{\{\omega\}} - \underline{E}(\{\omega\}|B))) + \delta \min(B(\mathbb{1}_{\{\omega\}} - \underline{E}(\{\omega\}|B))) \\ &= (1 - \delta) (P(\omega) - P(B) \underline{E}(\{\omega\}|B)) + \delta (-\underline{E}(\{\omega\}|B)), \end{aligned}$$

whence  $\underline{P}(B(\mathbb{1}_{\{\omega\}} - \underline{E}(\{\omega\}|B))) = 0$  if and only if  $P(\{\omega\}) = \frac{\underline{E}(\{\omega\}|B)(\delta + P(B))}{1 - \delta}$ . Moreover, since  $P(B) = \sum_{\omega \in B} P(\{\omega\})$ , we infer that

$$\sum_{\omega \in B} \frac{\underline{E}(\{\omega\}|B)(\delta + P(B))}{1 - \delta} = P(B).$$

The left hand side is equal to

$$\sum_{\omega \in B} \frac{(1 - \delta_B)P_B(\{\omega\}|B)(\delta + P(B))}{1 - \delta} = \frac{(1 - \delta_B)(\delta + P(B))}{1 - \delta},$$

so this is equal to  $P(B)$  if and only if

$$\delta_B = \frac{\delta + \delta P(B)}{\delta + P(B)}.$$

This completes the proof.

### Proof of Proposition 12

Consider the conditional probability measure  $P(\cdot|\mathcal{B})$  given by  $P(A|B) = P_B(A)$  for every  $B$  in  $\mathcal{B}$  and  $A \subseteq B$ , and let  $P_0$  denote the probability measure on  $\Omega$  determined by  $P_{\mathcal{B}}, P(\cdot|\mathcal{B})$ . Then it holds that, for any  $B \in \mathcal{B}$  and  $\omega \in B$ ,

$$\widehat{E}(\{\omega\}) = \check{E}((1 - \delta_B)P(\{\omega\}|B)\mathbb{1}_B) = (1 - \delta_{\mathcal{B}})(1 - \delta_B)P_0(\{\omega\}),$$

whence

$$\sum_{\omega \in B} \widehat{E}(\{\omega\}) = (1 - \delta_{\mathcal{B}})(1 - \delta_B) \sum_{\omega \in B} P_0(\{\omega\}) = (1 - \delta_{\mathcal{B}})(1 - \delta_B)P_0(B),$$

while

$$\widehat{E}(B) = \check{E}(\mathbb{1}_B) = (1 - \delta_{\mathcal{B}})P_{\mathcal{B}}(B).$$

Thus, Eq. (3) is not satisfied and therefore  $\widehat{E} \notin C_{LV}$ , since  $\delta_B$  and  $\delta_{\mathcal{B}}$  belong to the open interval  $(0, 1)$ .

### Proof of Proposition 14

Assume *ex absurdo* that there is some such PMM  $\overline{P}$ , and let  $(P, \delta)$  be its associated parameters. Consider a gamble  $f$  on  $B$  given by  $f = \sum_{i=1}^n x_i \mathbb{1}_{A_i}$  for  $x_1 = 1 > x_2 > \dots > x_n = 0$  and for a partition  $\{A_1, \dots, A_n\}$  of  $B$ , and let us characterise under which conditions we have that  $\overline{P}(\overline{P}(f|B) - Bf) = 0$ . Also, by coherence we get that

$$\underline{P}(A) \geq \underline{P}_{\mathcal{B}}(\underline{P}(A|\mathcal{B})) > 0 \tag{7}$$

for any event  $A$ .

First of all, taking into account that for any  $x > x_n$  it holds that

$$P(\{f \leq x\}) \geq P(A_n) > \frac{\delta}{1 + \delta},$$

since  $(1 + \delta)P(A_n) - \delta = \underline{P}(A_n|B) > 0$  by assumption, we deduce that if we apply Eq. (4) to compute  $\overline{P}(f|B)$  we obtain

$$\overline{P}(f|B) = x_n + (1 + \delta)P_B((f - x_n)^+) = (1 + \delta)P_B(f),$$

whence  $\overline{P}(f|B) - Bf = (1 + \delta)P_B(f) - Bf$ .

On the other hand, it follows from Eq. (7) that  $\underline{P}(\{\omega\}) > 0$  for every  $\omega \in B$ . As a consequence, defining  $g := \overline{P}(f|B) - Bf$ , for any value  $x > \min g = \overline{P}(f|B) - x_1 = \overline{P}(f|B) - 1$  it holds that

$$P(\{g \leq x\}) \geq P(A_1) > \frac{\delta}{1 + \delta},$$

since  $(1 + \delta)P(A_1) - \delta = \underline{P}(A_1) > 0$  by Eq. (7). Thus, Eq. (4) gives

$$\overline{E}(g) = \overline{P}(f|B) - 1 + (1 + \delta)P((G(f|B) - \min G(f|B))^+) = (1 + \delta)P_B(f) - 1 + (1 + \delta)P(B(1 - f)).$$

Therefore,

$$\overline{E}(g) = 0 \Leftrightarrow (1 + \delta)P_B(f) - 1 + (1 + \delta)P(B(1 - f)) = 0 \Leftrightarrow P(f) = P_B(f) + P_0(B) - \frac{1}{1 + \delta}.$$

Applying this to  $f = \mathbb{1}_{\{\omega\}}$  for some  $\omega \in B$ , we obtain that  $P$  should satisfy

$$P(\{\omega\}) = P_B(\{\omega\}) + P_0(B) - \frac{1}{1+\delta}. \quad (8)$$

This means that

$$\begin{aligned} \sum_{\omega \in B} P(\{\omega\}) &= 1 + |B|P_0(B) - \frac{|B|}{1+\delta} = P_0(B) \\ \Leftrightarrow P_0(B) &= \frac{|B| - 1 - \delta}{(|B| - 1)(1 + \delta)}, \end{aligned}$$

and this for every  $B \in \mathcal{B}$ . If we consider  $B$  with more than two elements and take both  $\omega_1, \omega_2 \in B$  with  $\omega_1 \neq \omega_2$ , then  $\overline{E}(\overline{P}(\mathbb{1}_{\{\omega_1, \omega_2\}}|B) - B\mathbb{1}_{\{\omega_1, \omega_2\}}) = 0$  if and only if

$$P(\{\omega_1, \omega_2\}) = P_B(\{\omega_1, \omega_2\}) + P_0(B) - \frac{1}{1+\delta};$$

but by Eq. (8) it is

$$P(\{\omega_1, \omega_2\}) = P_B(\{\omega_1, \omega_2\}) + 2P_0(B) - 2\frac{1}{1+\delta};$$

and this can only be if  $P_0(B) = \frac{1}{1+\delta}$ . Since  $\frac{1}{1+\delta} \neq \frac{|B|-1-\delta}{(|B|-1)(1+\delta)}$ , we obtain a contradiction.

Finally, if  $|B| = 2$  for all  $B$  then it must be  $|\mathcal{B}| = \frac{n}{2}$ . We get on the one hand  $P_0(B) = \frac{1-\delta}{1+\delta}$  for all  $B$ , and the equality  $1 = \sum_B P_0(B) = \frac{n}{2}P_0(B)$  implies that  $\delta = \frac{n-2}{n+2}$ ; but on the other hand for  $\underline{P}(B) > 0$  we should have then  $n < 4$ ; this means that  $n = 2$  and that  $\mathcal{B}$  has only one element.
